# Supplementary material for: RHOJ controls EMT-associated resistance to chemotherapy
Source: PubMed Central journal article supplement (PMC10076223; doi:10.1038/s41586-023-05838-7), 2023-03-22

---

**Supplementary information**

---

**RHOJ controls EMT-associated resistance to chemotherapy**

---

In the format provided by the  
authors and unedited

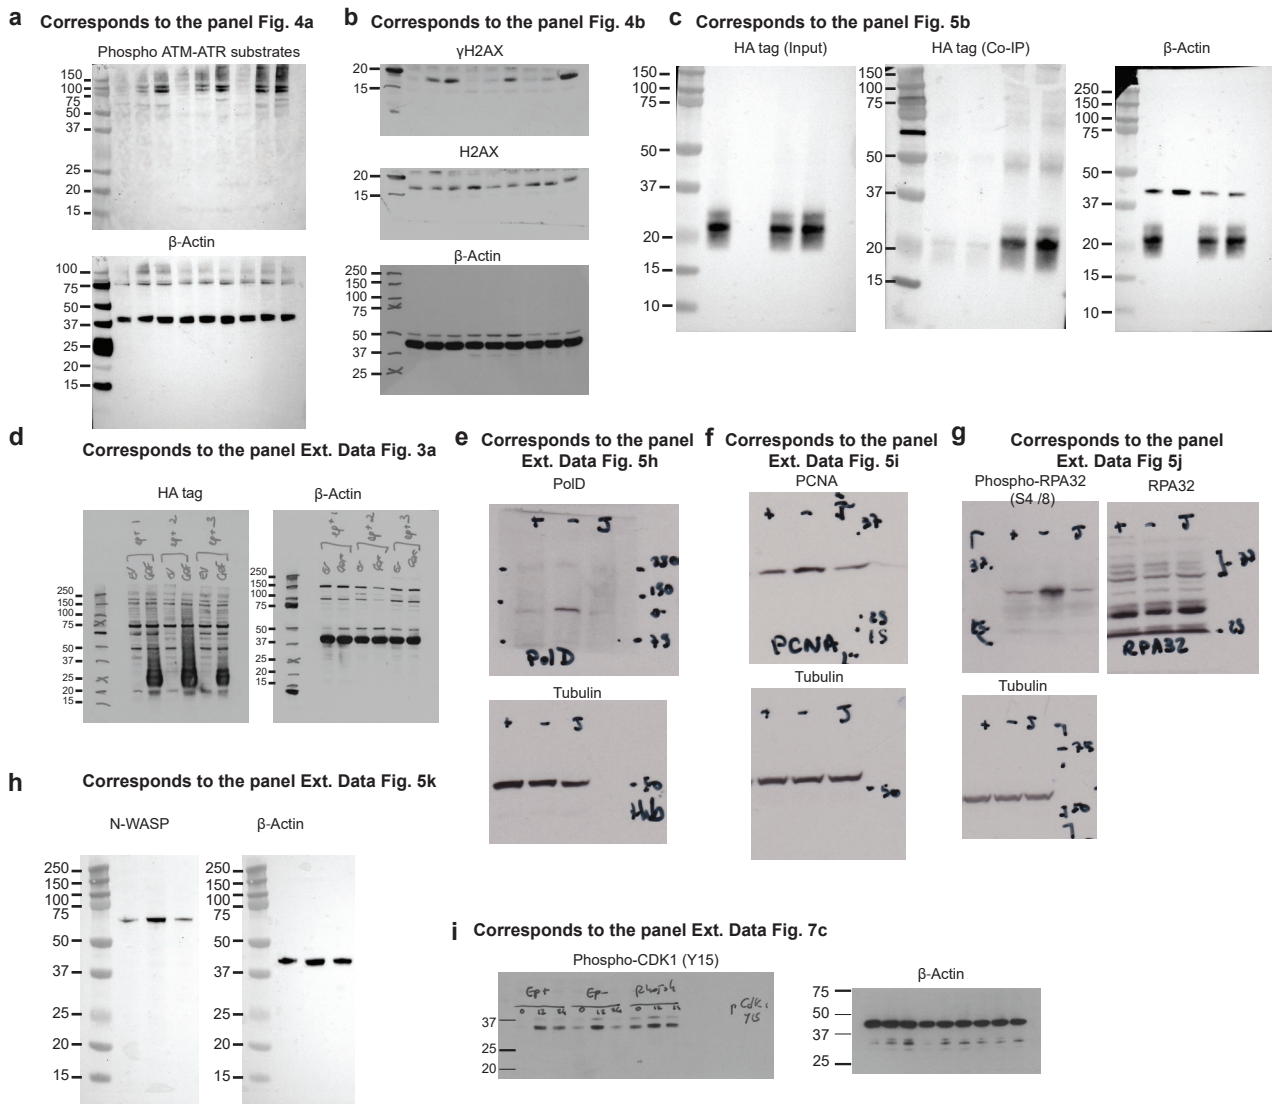

Supplementary Information Figure 1

**a** Corresponds to the panel Ext. Data Fig. 7d

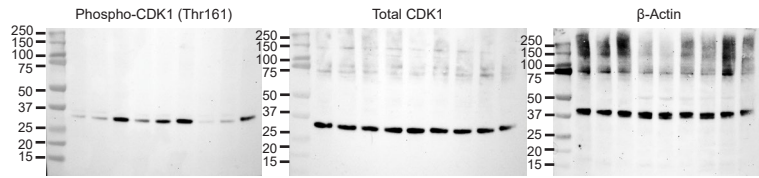

**b** Corresponds to the panel Ext. Data Fig. 7e

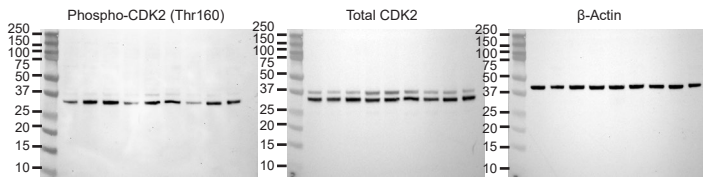

**c** Corresponds to the panel Ext. Data Fig. 7f

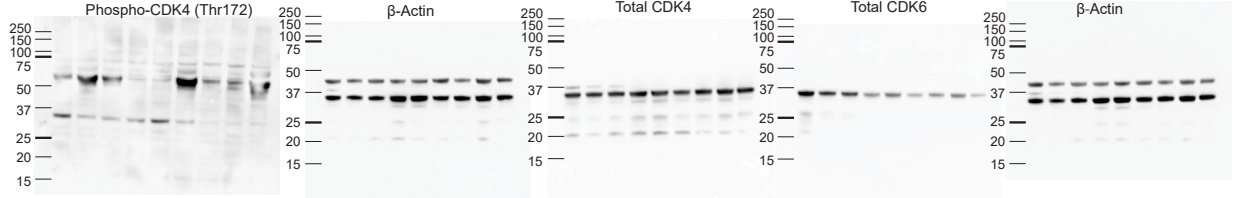

**d** Corresponds to the panel Ext. Data Fig. 8c

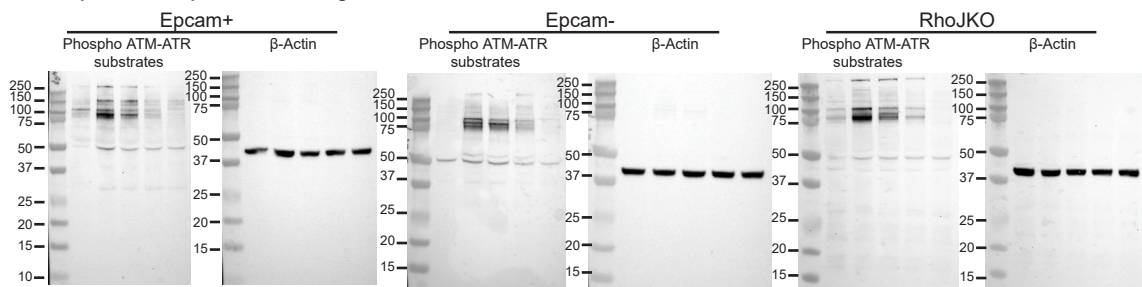

**e** Corresponds to the panel Ext. Data Fig. 8h

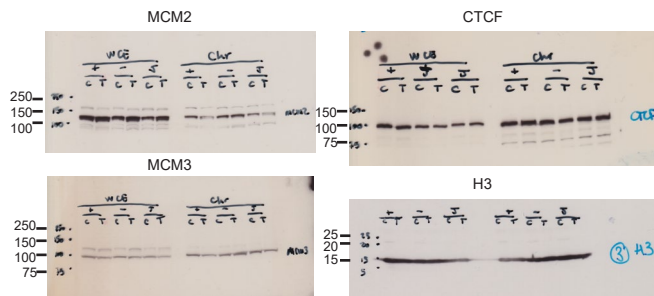

**f** Corresponds to the panel Ext. Data Fig. 3e

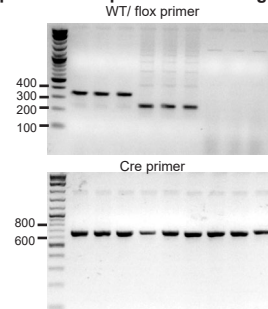

Supplement: 41586_2023_5838_MOESM1_ESM.pdf [file 41586_2023_5838_MOESM1_ESM.pdf]
